# Supplementary material for: Pioneer generation shapes long-term recovery of coral populations
Source: Research Square preprint supplement (doi:10.21203/rs.3.rs-6548265/v1), 2025-05-12
Supplement: Supplementary file 1 [file 071201fb077a37ca115bc9e1.docx]

Supplementary materials for

**“Pioneer generation shapes long-term recovery of coral populations”**

Aziz J. Mulla1,2,3, Vianney Denis*2 and Yoko Nozawa1,4

1 Biodiversity Research Center, Academia Sinica, Nangang, Taipei 115, Taiwan

2 Institute of Oceanography, National Taiwan University, Taipei 10617, Taiwan

3 Université Côte d'Azur, CNRS, UMR 7035 ECOSEAS, Nice, France

4 Tropical Biosphere Research Center, University of the Ryukyus, Okinawa, Japan

***Corresponding author:**

Vianney Denis

Email: vianneydenis@ntu.edu.tw

Address: Institute of Oceanography, National Taiwan University, Number 1, Section 4, Roosevelt Road, Da’an District, Taipei 10617, Taiwan

**Table S1.** Linear mixed-effects model to evaluate changes in size between groups (*Pocillopora* and other genera) within each year

| Year | Contrast | Estimate | SE | z ratio | p value |
| --- | --- | --- | --- | --- | --- |
| 2012 | poc - other | -6.51 | 7.68 | -0.848 | 0.3962 |
| 2013 | poc - other | -5.32 | 6.51 | -0.818 | 0.4134 |
| 2014 | poc - other | 6.18 | 6.51 | 0.949 | 0.3427 |
| 2015 | poc - other | 55.18 | 6.75 | 8.170 | <.0001 |
| 2016 | poc - other | 69.40 | 8.11 | 8.556 | <.0001 |
| 2017 | poc - other | 94.31 | 9.18 | 10.270 | <.0001 |
| 2018 | poc - other | 91.72 | 9.68 | 9.479 | <.0001 |
| 2019 | poc - other | 117.35 | 10.40 | 11.333 | <.0001 |
| 2020 | poc - other | 89.59 | 10.60 | 8.480 | <.0001 |

**Table S2.** Dunn’s test for pairwise comparisons showing differences in fecundity between years

| Comparison | p value | Adjusted p value |
| --- | --- | --- |
| 2012 – 2020 vs 2013 – 2020 | 0.0073 | 0.0073 |
| 2012 – 2020 vs 2014 – 2020 | 0.0175 | 0.0175 |
| 2012 – 2020 vs 2015 – 2020 | 0.0002 | 0.0002 |
| 2013 – 2020 vs 2014 – 2020 | 0.3452 | 1.0000 |
| 2013 – 2020 vs 2015 – 2020 | 0.0094 | 0.0094 |
| 2014 – 2020 vs 2015 – 2020 | 0.0244 | 0.0244 |

**Figure S1.** Photo showing the reef in 2018 at the height of dominance
